# Supplementary material for: H1 Hemagglutinin Priming Provides Long-Lasting Heterosubtypic Immunity against H5N1 Challenge in the Mouse Model
Source: PubMed Central journal article supplement (PMC7773984; doi:10.1128/mbio.02090-20), 2020-12-15
Supplement: mBio.02090-20-st001.pdf [file mBio.02090-20-st001.pdf]

Supplementary Table 1

Differential lethality of H5N1 in mice primed with heterosubtypic strains

| Priming group | Influenza H5N1 lethal dose 50% (LD <sub>50</sub> ) |                     |                     |                     |
|---------------|----------------------------------------------------|---------------------|---------------------|---------------------|
|               | Day 90                                             | Day 180             | Day 270             | Day 360             |
| B-H1          | 5.6x10 <sup>3</sup>                                | 3.2x10 <sup>4</sup> | 1.8x10 <sup>4</sup> | 3.2x10 <sup>4</sup> |
| B-H3          | 3.2x10 <sup>2</sup>                                | 3.2x10 <sup>3</sup> | 3.2x10 <sup>3</sup> | 3.2x10 <sup>3</sup> |
| WT            | 5.6x10 <sup>2</sup>                                | 3.2x10 <sup>3</sup> | 1.8x10 <sup>3</sup> | 3.2x10 <sup>3</sup> |
| PBS           | 3.2x10 <sup>2</sup>                                | 3.2x10 <sup>3</sup> | 1.8x10 <sup>3</sup> | 3.2x10 <sup>3</sup> |
